# Supplementary material for: Pyramidal cell types drive functionally distinct cortical activity patterns during decision-making
Source: PubMed Central journal article supplement (PMC9991922; doi:10.1038/s41593-022-01245-9), 2023-01-23
Supplement: 41593_2022_1245_MOESM1_ESM.pdf [file 41593_2022_1245_MOESM1_ESM.pdf]

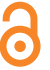

# Pyramidal cell types drive functionally distinct cortical activity patterns during decision-making

---

In the format provided by the authors and unedited

**Table 1. Overview of different model variables**

| <b>Variable name</b>             | <b>Description</b>                                       | <b>Variable type</b>  | <b>Category</b> |
|----------------------------------|----------------------------------------------------------|-----------------------|-----------------|
| Hindlimb                         | Piezo sensor below the animal                            | Analog + Event kernel | Movement        |
| Handles (Left / Right)           | Touch events from handle sensors                         | Event kernel          | Movement        |
| Licks (Left / Right)             | Lick events from spout sensors                           | Event kernel          | Movement        |
| Pupil                            | Pupil diameter, extracted from face camera               | Analog + Event kernel | Movement        |
| Nose                             | Nose movements, extracted from face camera               | Analog + Event kernel | Movement        |
| Whisking                         | Whisker movements, extracted from face camera            | Analog + Event kernel | Movement        |
| Body                             | Average motion energy across all body camera pixels      | Analog + Event kernel | Movement        |
| Video                            | Video dimensions from both cameras (SVD)                 | Analog                | Movement        |
| Video ME                         | Video dimensions from motion energy in both cameras      | Analog                | Movement        |
| Choice (Left / Right)            | All frames in either a left- or a rightward choice trial | Event kernel          | Task            |
| Previous choice                  | Every trial after a leftward choice trial                | Event kernel          | Task            |
| Previous modality                | Every trial after a visual trial                         | Event kernel          | Task            |
| Previous success                 | Every trial after a successful trial                     | Event kernel          | Task            |
| Success                          | All successful trials                                    | Event kernel          | Task            |
| Water given                      | All frames after a water reward was given                | Event kernel          | Task            |
| Auditory stimulus (Left / Right) | All frames after a left- or rightward auditory stimulus  | Event kernel          | Task            |

**Table 2: Number of mice included for each experiment**

|                          | <b>Optogenetics</b> | <b>Widefield</b> | <b>Two-photon</b> |
|--------------------------|---------------------|------------------|-------------------|
| Emx                      | 9                   | 4                | -                 |
| CStr                     | 9                   | 4                | -                 |
| Fezf2                    | 8                   | 5                | -                 |
| PlexinD1                 | 8                   | 4                | -                 |
| Camk2 $\alpha$ -tTA;G6s2 | -                   | -                | 3                 |

**Table 3: Resources**

| Reagent/resource                                                                                | Source                                     | Identifier  |
|-------------------------------------------------------------------------------------------------|--------------------------------------------|-------------|
| <b>Antibodies</b>                                                                               |                                            |             |
| Goat polyclonal anti-GFP                                                                        | Abcam                                      | ab6673      |
| Donkey Anti-Goat Alexa Fluor 488                                                                | Abcam                                      | ab150129    |
| <b>Viral strains</b>                                                                            |                                            |             |
| CAV-2-Cre                                                                                       | Plateforme de Vectorologie de Montpellier  | N/A         |
| AAV1-hSyn1-SIO-stGtACR2-FusionRed                                                               | Penn Vector Core                           | 105677-AAV1 |
| AAVrg-CAG-tdTomato                                                                              | Penn Vector Core                           | 59462-AAVrg |
| AAV-DJ-hSYN-DIO-hCAR {off}<br>(Titer: 5.7e12 vg/ml)                                             | Laboratory of Adam Kepecs                  |             |
| <b>Experimental Models</b>                                                                      |                                            |             |
| Mouse: Emx1-IRES-Cre: Emx1 <sup>tm1(cre)Kvj</sup>                                               | The Jackson Laboratory                     | JAX#005628  |
| Mouse: ROSA:LNL:tTA: Gt(ROSA)26Sor <sup>tm1(tTA)Roos</sup>                                      | The Jackson Laboratory                     | JAX#008600  |
| Mouse: Camk2 $\alpha$ -tTA: Tg(Camk2a-tTA)1Mmay                                                 | The Jackson Laboratory                     | JAX#003010  |
| Mouse: Ai93(TITL-GCaMP6f)-D (Ai93D): Igs7 <sup>tm93.1(tetO-GCaMP6f)Hze</sup>                    | The Jackson Laboratory                     | JAX#024103  |
| Mouse: Ai162(TIT2L-GC6s-ICL-tTA2)-D (Ai162D): Igs7 <sup>tm162.1(tetO-GCaMP6s,CAG-tTA2)Hze</sup> | H. Zeng, Allen Institute for Brain Science | JAX#031562  |
| Mouse: TRE-GCaMP6s (G6s2): Tg(tetO-GCaMP6s)2Niell                                               | The Jackson Laboratory                     | JAX#024742  |
| Mouse: H2B-eGFP: Tg(HIST1H2BB/EGFP)1Pa                                                          | The Jackson Laboratory                     | JAX#006069  |
| Mouse: Fezf2-2A-CreER: Fezf2 <sup>tm1.1(cre/ERT2)Zjh</sup>                                      | The Jackson Laboratory                     | JAX#036296  |
| Mouse: PlexinD1-2A-CreER: Plxnd1 <sup>tm2.1(flpo)Zjh</sup>                                      | The Jackson Laboratory                     | JAX#036295  |
| <b>Software</b>                                                                                 |                                            |             |
| MATLAB 2018B                                                                                    | Mathworks                                  |             |
| Python 3.6.10                                                                                   | Python Software Foundation                 |             |
| <b>Other</b>                                                                                    |                                            |             |
| Bpod State Machine r0.5                                                                         | Sanworks                                   | N/A         |
